# Supplementary material for: IL-4 induces reparative phenotype of RPE cells and protects against retinal neurodegeneration via Nrf2 activation
Source: PubMed Central journal article supplement (PMC9768119; doi:10.1038/s41419-022-05433-0), 2022-12-20
Supplement: 41419_2022_5433_MOESM1_ESM.pdf [file 41419_2022_5433_MOESM1_ESM.pdf]

## **Supplementary Information**

### **IL-4 induces reparative phenotype of RPE cells and protects against retinal neurodegeneration via Nrf2 activation**

Tian Zhou<sup>1,2</sup>, Ziqi Yang<sup>1,2</sup>, Biyan Ni<sup>1,2</sup>, Hong Zhou<sup>1</sup>, Huiyi Xu<sup>1</sup>, Xiaojing Lin<sup>1</sup>, Yingmin Li<sup>1</sup>,  
Chunqiao Liu<sup>1</sup>, Rong Ju<sup>1</sup>, Jian Ge<sup>1</sup>, Chang He<sup>1,3</sup>, Xialin Liu<sup>1,3</sup>

<sup>1</sup> State Key Laboratory of Ophthalmology, Zhongshan Ophthalmic Center, Sun Yat-sen University, Guangdong Provincial Key Laboratory of Ophthalmology and Visual Science, Guangzhou 510060, China.

<sup>2</sup>These authors contributed equally to this work.

<sup>3</sup>Correspondence:

Xialin Liu (liuxl28@mail.sysu.edu.cn); Chang He (hech33@mail.sysu.edu.cn)

Running title: IL-4 protects RPE cells via Nrf2

Supplementary Figures 1-4;

Supplementary Table 1;

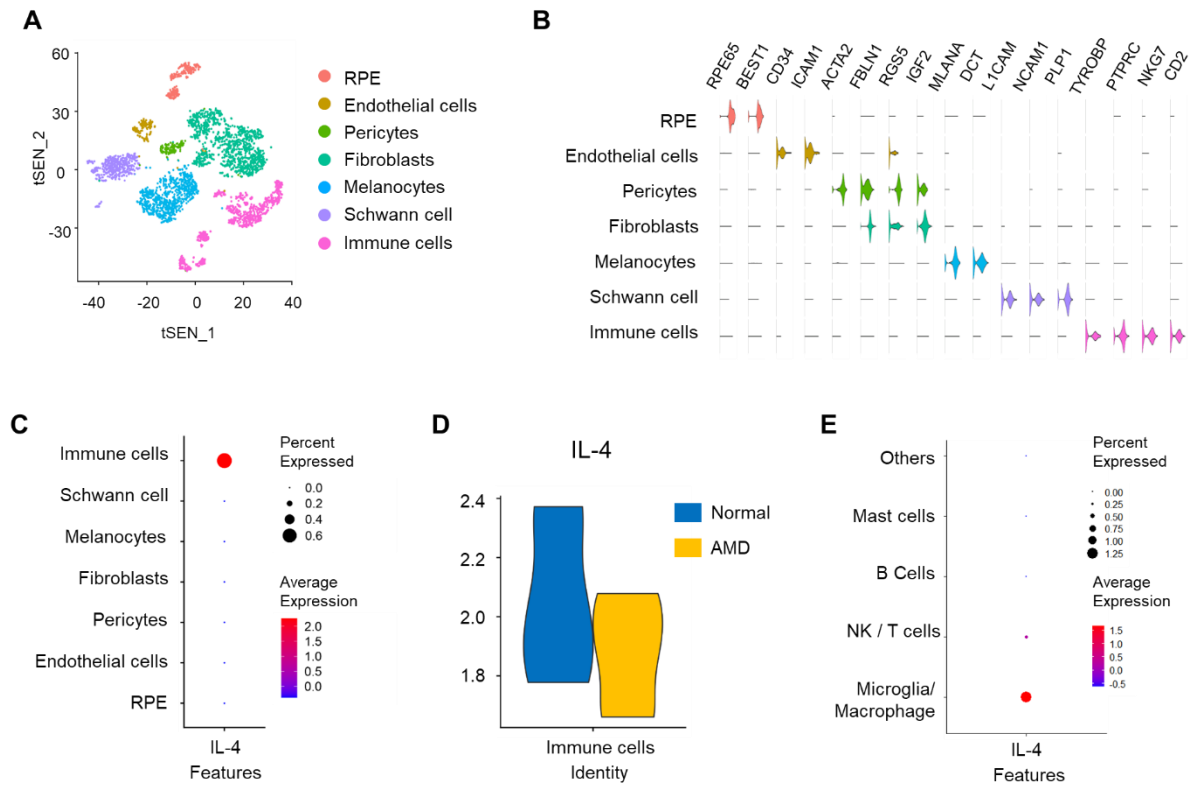

**Figure S1. scRNA-seq analysis of human RPE/choroid complex showed decreased IL-4 expression in AMD patients.**

(A) t-SNE for scRNA-seq data of human RPE/choroid complex from AMD patient and healthy control. The sub-clustering reveals various cell populations. Each dot represents one cell. (B) The marker genes expression of every cell cluster by scRNA-seq. (C) Dot plot representing expression levels and frequencies of IL-4 among different cell clusters. Among them, IL-4 was specifically expressed in immune cells in comparison to other cell types. (D) Violin Plot showing the decreased IL-4 expression in AMD patient in comparison to normal control. (E) Immune cells were further interrogated into different subclusters based on their markers, including microglia/macrophage, NK/T cells, B cells, mast cells, and others. Dot plot showing that IL-4 was mainly enriched in microglia/macrophage.

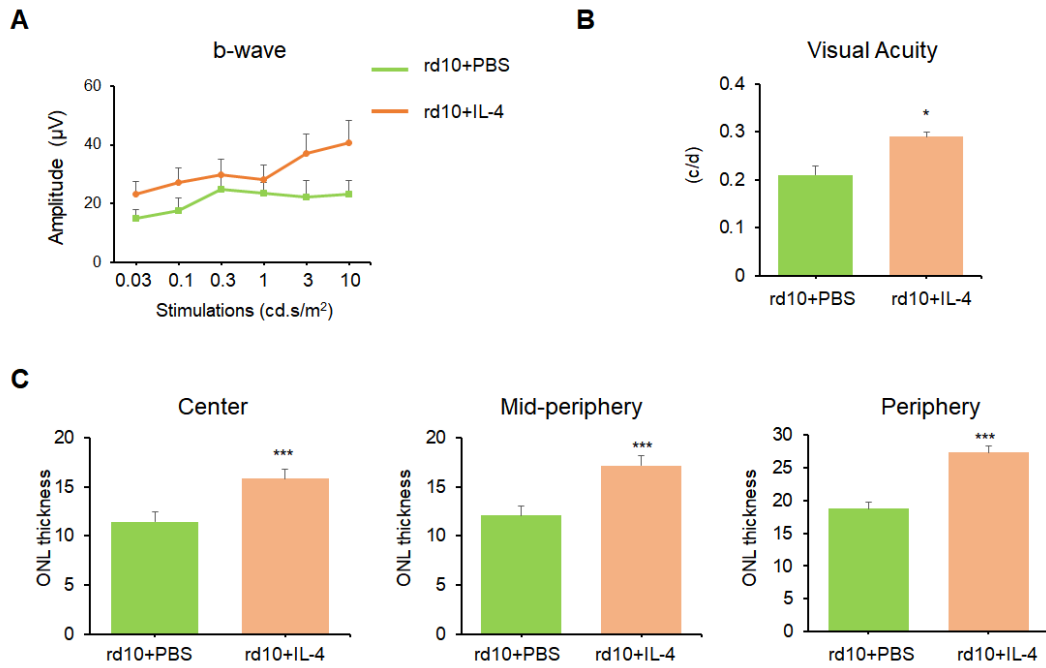

**Figure S2. IL-4 protected the retina against neurodegeneration in the rd10 mice.**

(A) ERG examinations showed IL-4 treatment protected the retinal neurofunction with increased amplitudes of b-waves in rd10 mice.  $n = 6$  (B) The measurement of visual acuity demonstrated improved visual acuity response after IL-4 treatment.  $n = 6$ . (C) The ONL thickness was calculated from H&E staining at the center, mid-periphery and periphery areas. IL-4 treatment increased the ONL thickness, particularly in the periphery area.  $n = 3$ . Data are shown as mean  $\pm$  SEM, \* $P < 0.01$ , \*\* $P < 0.05$ , \*\*\* $P < 0.001$ , n.s.: not significant, one-way ANOVA test.

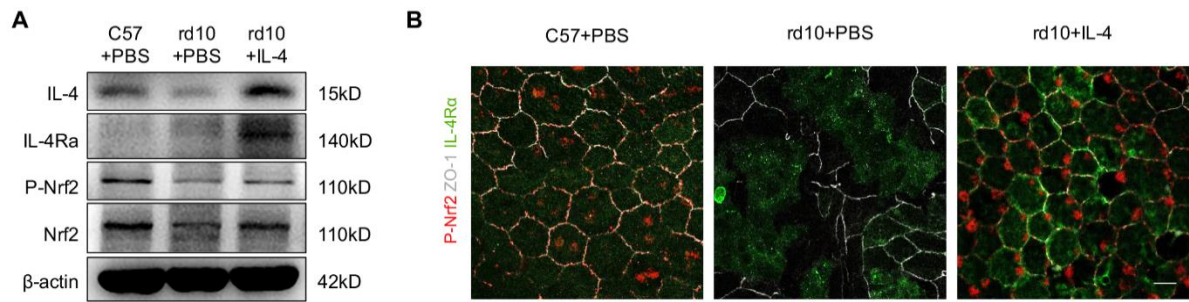

**Figure S3. IL-4 upregulated the IL-4R and activated Nrf2 signaling in rd10 mice.**

(A) Western blotting analysis showed that IL-4Ra and p-Nrf2 expression were increased in RPE complex from the IL-4 treated rd10 mice. (B) Representative images of RPE flat-mount sheet revealed that IL-4 treatment up-regulated the expression of IL-4Ra alongside the RPE tight junction marker ZO-1. The p-Nrf2 was also accumulated alongside the hexagonal-shaped RPE in the IL-4 treated rd10 mice. Scale bar: 20  $\mu$ m.

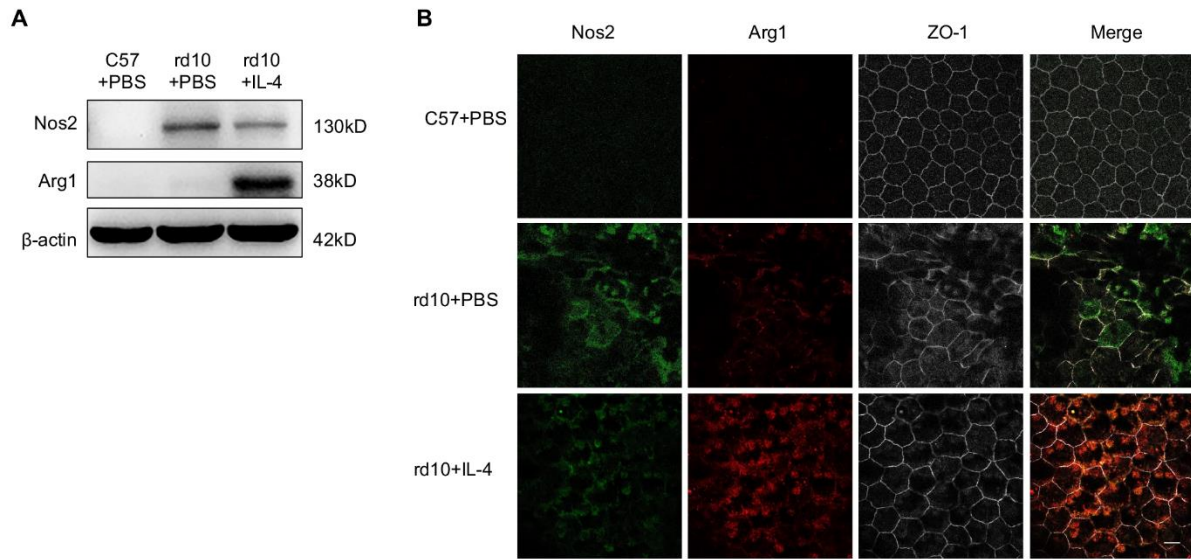

**Figure S4. IL-4 suppressed the Nos2 and promoted Arg1 expression in rd10 mice.**

(A) Western blotting analysis of RPE complex showed high expression of Nos2 in rd10 mice, whereas IL-4 treatment suppressed the expression of Nos2 and promoted the expression of Arg1. (B) In the RPE flat-mounts, rd10 mice also displayed elevated Nos2 expression alongside the disrupted hexagonal-shaped RPE cell. After IL-4 treatment, the barrier structures of RPE cells were preserved with decreased Nos2 expression and increased Arg1 level. Scale bar: 20  $\mu$ m.

**Supplement Table 1.** Sequences of the primers used in this study.

| Gene name                      | Orientation | Primer sequence (5' to 3') | Species |
|--------------------------------|-------------|----------------------------|---------|
| <i>Nos2</i>                    | Forward     | TTCAGTATCACAACTCAGCAAG     | Mouse   |
|                                | Reverse     | TGGACCTGCAAGTAAAATCCC      | Mouse   |
| <i>Il-6</i>                    | Forward     | TTCAGGCAGGCAGTATCACTC      | Mouse   |
|                                | Reverse     | GAAGGTCCACGGGAAAGACAC      | Mouse   |
| <i>Arg1</i>                    | Forward     | TCAGCGTGTCCAAACACTGAG      | Mouse   |
|                                | Reverse     | CGCCAAGGGAGTTAAAGACTT      | Mouse   |
| <i>Il-4ra</i>                  | Forward     | TCTGCATCCCGTTGTTTTGC       | Mouse   |
|                                | Reverse     | GCACCTGTGCATCCTGAATG       | Mouse   |
| <i>Il-4</i>                    | Forward     | GGTCTCAACCCCCAGCTAGT       | Mouse   |
|                                | Reverse     | GCCGATGATCTCTCTCAAGTGAT    | Mouse   |
| <i>Il-10</i>                   | Forward     | TCCAGCCTTACATCCACCTC       | Mouse   |
|                                | Reverse     | GCTGCTGTCTGTGGATTCA        | Mouse   |
| <i>Tnf-<math>\alpha</math></i> | Forward     | CCCTCACACTCAGATCATCTTCT    | Mouse   |
|                                | Reverse     | GCTACGACGTGGGCTACAG        | Mouse   |
| <i>Ifn-<math>\gamma</math></i> | Forward     | ATGAACGCTACACACTGCATC      | Mouse   |
|                                | Reverse     | CCATCCTTTTGCCAGTTCCTC      | Mouse   |
| <i>Cxcl1</i>                   | Forward     | CTGGGATTCACCTCAAGAACATC    | Mouse   |
|                                | Reverse     | CAGGGTCAAGGCAAGCCTC        | Mouse   |
| <i>Cxcl2</i>                   | Forward     | CCAACCACCAGGCTACAGG        | Mouse   |
|                                | Reverse     | GCGTCACACTCAAGCTCTG        | Mouse   |

| Gene name     | Orientation | Primer sequence (5' to 3') | Species |
|---------------|-------------|----------------------------|---------|
| <i>Cxcl10</i> | Forward     | CCAAGTGCTGCCGTCATTTTC      | Mouse   |
|               | Reverse     | GGCTCGCAGGGATGATTTCAA      | Mouse   |
| <i>Cxcr1</i>  | Forward     | TCTGGACTAATCCTGAGGGTG      | Mouse   |
|               | Reverse     | GCCTGTTGGTTATTGGA ACTCTC   | Mouse   |
| <i>Cxcr2</i>  | Forward     | ATGCCCTCTATTCTGCCAGAT      | Mouse   |
|               | Reverse     | GTGCTCCGTTGTATAAGATGAC     | Mouse   |
| <i>Hmox1</i>  | Forward     | AAGCCGAGAATGCTGAGTTCA      | Mouse   |
|               | Reverse     | GCCGTGTAGATATGGTACAAGGA    | Mouse   |
| <i>Keap1</i>  | Forward     | TGCCCTGTGGTCAAAGTG         | Mouse   |
|               | Reverse     | GGTTCGGTTACCGTCCTGC        | Mouse   |
| <i>Nfkb1</i>  | Forward     | GGAGGCATGTTCCGGTAGTGG      | Mouse   |
|               | Reverse     | CCCTGCGTTGGATTTCTGTG       | Mouse   |
| <i>Nqo1</i>   | Forward     | AGGATGGGAGGTA CTGAATC      | Mouse   |
|               | Reverse     | AGGCGTCCTTCCTTATATGCTA     | Mouse   |
| <i>Fomx1</i>  | Forward     | CTGATTCTCAA AAGACGGAGGC    | Mouse   |
|               | Reverse     | TTGATAATCTTGATTCCGGCTGG    | Mouse   |
| <i>Gpx1</i>   | Forward     | AGTCCACCGTGTATGCCTTCT      | Mouse   |
|               | Reverse     | GAGACGCGACATTCTCAATGA      | Mouse   |
| <i>Gapdh</i>  | Forward     | GCCAAGGCTGTGGGCAAGGT       | Mouse   |
|               | Reverse     | TCTCCAGGCGGCACGTCAGA       | Mouse   |
