# Supplementary material for: IL-4 induces reparative phenotype of RPE cells and protects against retinal neurodegeneration via Nrf2 activation
Source: PubMed Central journal article supplement (PMC9768119; doi:10.1038/s41419-022-05433-0), 2022-12-20

Figure 1D

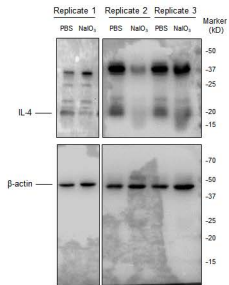

Figure 4B

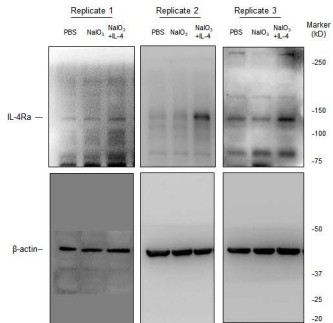

Figure 4D

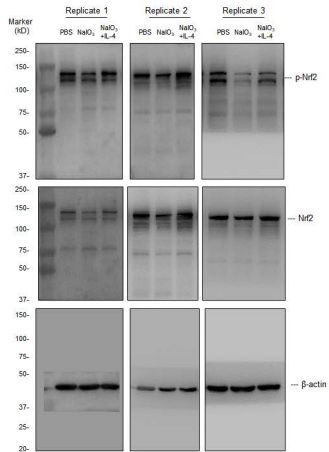

Figure S3A, S4A

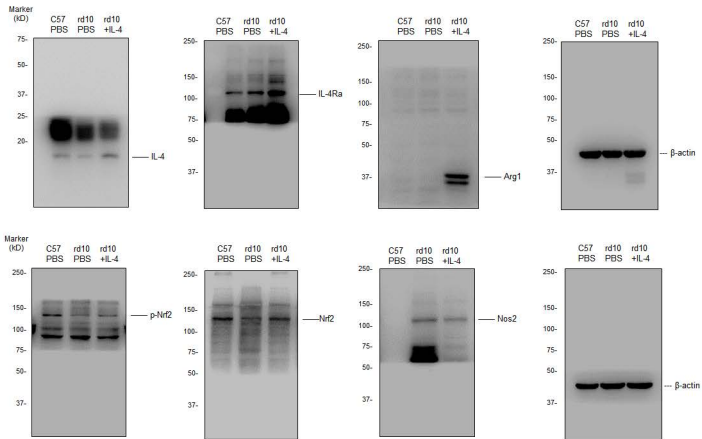

Supplement: 41419_2022_5433_MOESM2_ESM.pdf [file 41419_2022_5433_MOESM2_ESM.pdf]
